# Supplementary material for: A simulation-free constrained regression approach for flux estimation in isotopically nonstationary metabolic flux analysis with applications in microalgae
Source: Front Plant Sci. 2023 Nov 23;14:1140829. doi: 10.3389/fpls.2023.1140829 (PMC10702240; doi:10.3389/fpls.2023.1140829)
Supplement: Supplementary file 2 [file Table_1.xlsx]

## Sheet: Sheet1
Table S1. P-values obtained from ANOVA to test for steady state in measured metabolite pool size for metabolites whose MIDs enter the regression
P-values below 0.05 (marked red) indicate no steady state.
condition	LL				EIL
time points	0-40sec			0-20sec	0-40sec
	C. reinhardtii	C. sorokiniana	C. ohadii	C. ohadii	C. ohadii
RuBP	0.0416945	0.449959	0.0627075	0.0735383	0.564327
DHAP	0.224185	0.275189	0.0137328	0.188612	0.601584
FBP	0.00205217	0.715108	4.26794e-05	0.00161562	0.38876
F6P	0.281827	0.64174	0.000107515	0.21721	0.843175
G6P	0.100812	0.139237	0.00581737	0.638788	0.685884
PP	0.38579	0.523976	0.303811	0.292078	0.692808
G1P	0.961417	0.275471	0.00101908	0.116311	0.184729
ADPG	0.0348673	0.196188	5.03098e-06	0.00776586	0.0226738
UDPG	0.063785	0.346602	0.00128163	0.0438972	0.109317
