# Supplementary material for: A simulation-free constrained regression approach for flux estimation in isotopically nonstationary metabolic flux analysis with applications in microalgae
Source: Front Plant Sci. 2023 Nov 23;14:1140829. doi: 10.3389/fpls.2023.1140829 (PMC10702240; doi:10.3389/fpls.2023.1140829)
Supplement: Supplementary file 3 [file Table_2.xlsx]

## Sheet: MID abundance
Absolute mass isotopomer abundance in units nmol/sample. Data are obtained from Treves et al.
Light	Alga	Labeling time (sec)	ADPG-0	ADPG-1	ADPG-2	ADPG-3	ADPG-4	ADPG-5	ADPG-6	FBP-0	FBP-1	FBP-2	FBP-3	FBP-4	FBP-5	FBP-6	DHAP-0	DHAP-1	DHAP-2	DHAP-3	G6P-0	G6P-1	G6P-2	G6P-3	G6P-4	G6P-5	G6P-6	f6p-0	f6p-1	f6p-2	f6p-3	f6p-4	f6p-5	f6p-6	g1p-0	g1p-1	g1p-2	g1p-3	g1p-4	g1p-5	g1p-6	PP-0	PP-1	PP-2	PP-3	PP-4	PP-5	RuBP-0	RuBP-1
100 uE	Chlamy	0	12.84	0.24	0.16	0	0	0	0	39.83	0	0	0.18	0	0	0	25.13	0	0	0	118.12	0	0	0	0	0	0	24.93	1	0	0	0	0	0	32.48	0.08	0.57	0	0	0	0	6.17	0.08	0	0	0	0	187.3	4.36
100 uE	Chlamy	0	11.26	0	0	0	0	0	0	34.77	0	0	0.09	0.2	0	0	33.02	0.29	0	0	140.88	0	0	0	0	0	0	44.27	0	0	0	0	0	0	31.49	0	0	0	0	0	0	11.47	0.5	0	0	0	0	228.82	2.47
100 uE	Chlamy	0	7.21	0	0	0	0	0	0	32.37	0	0.29	0.3	0	0	0	21.27	0	0	0	106.63	0	0	0	0	0	0	18.51	0.61	0	0	0	0	0	31.13	0	0	0	0	0	0	3.26	0	0	0	0	0	190.52	4.87
100 uE	Chlamy	5	6.23	0.15	0.07	0	0	0	0	23.99	10.69	5.04	0	0.08	0	0.2	19.99	1.16	0.89	0	56.11	4.32	10.78	0	0.01	0	0	10.32	1.98	5.11	0	0	0	0	22.67	4.49	0.75	0	0.02	0	0	4.55	1.01	0.36	0	0	0	176.49	61.23
100 uE	Chlamy	5	6.85	0.08	0	0	0	0	0	21.67	17.47	3.04	0	0	0	0.13	31.51	10.32	0.93	0	107.15	7.67	2.58	0	0	0	0	28.35	4.47	5.72	0	0	0	0	25.98	4.64	1.15	0	0	0	0	8.37	2.74	0.55	0	0	0	180.5	44.1
100 uE	Chlamy	5	4.6	0	0.05	0	0	0	0	12.74	7.6	1.49	0.81	0.38	0	0	14.19	3.95	1.09	0	45.47	4.64	13.29	0	0	0	0	8.44	3.15	2.26	0.27	0	0	0	20.11	4.41	1.98	0	0	0	0	2.17	0	1.15	0	0	0	99.15	35.32
100 uE	Chlamy	10	10.66	0.6	0.78	0.23	0.05	0	0	31.09	28.99	14.14	1.72	0.17	0	0.22	27.91	14.11	2.09	0.78	154.96	31.35	25.18	0	0.25	0.16	0	45.55	17.29	5.52	1.9	0.48	0	0	27.16	9.65	3.1	0.22	0	0	0	7	6.35	0.69	0	0	0	283.5	162.53
100 uE	Chlamy	10	9.86	1.14	1.12	0	0	0	0	25.87	29.69	10.1	2.4	0.24	0.34	0.22	15.16	8.45	3.75	0	76.52	15.47	16.98	0	0.01	0	0	12.74	8.35	15.79	0	0	0	0	19.2	7.23	2.9	0.31	0	0	0	1.71	2.14	1.08	0	0	0	164.32	111.62
100 uE	Chlamy	10	7.04	1.23	0	0.05	0	0	0	26.32	17.53	8	1.28	0	0.35	0	17.07	9.72	1.73	0	84.04	18.64	9.72	0.17	0	0	0	18.99	3.87	5.91	0	0	0	0	21.44	4.28	0.96	0.33	0	0	0	3.58	0.72	0	0	0	0	167.49	88.85
100 uE	Chlamy	20	6.54	3.75	1.87	0.81	0.1	0	0	15.06	12.22	10.43	2.78	1.89	0.29	0	25.92	21.68	4.56	0.53	126.97	47.74	65.27	6.74	1.16	0.12	0.3	35.25	26.19	28.23	2.42	2.11	0.07	0	26.72	13.33	10.38	2.63	0.41	0	0.05	3.91	8.24	2.98	0.76	0	0	120.12	120.19
100 uE	Chlamy	20	9.33	3.32	2.12	0.49	0.08	0.05	0	19.15	20.9	15.52	6.78	1.26	0.13	0	22.09	20.31	6.43	0.21	149.52	54.32	39.09	9.5	1.96	0	0	29.64	18.86	0	4.25	2.18	0	0	21.51	6.09	3.13	0.85	0.26	0.04	0	7.8	5.93	1.32	0.63	0	0	182.29	151.65
100 uE	Chlamy	20	4.58	2.71	2.32	0.15	0.12	0	0	13.86	12.59	12.04	3.23	0.4	0	0	13.62	10.51	3.28	0.46	63.15	21.37	20.29	2.53	0	0	0	9.81	8.37	7.76	3.01	0.32	0.17	0	7.88	4.05	3.56	1.08	0.04	0	0	2.59	1.78	2.35	1.04	0.35	0	90.6	95.25
100 uE	Chlamy	40	2.41	1.73	1.31	0.92	0.1	0.24	0	3	7.16	4.99	3.17	2.17	0.92	0.3	10.87	14.1	5.41	1.23	52.55	23.92	37.67	11.43	6.5	0.14	0.16	15.25	9.55	18.01	3.66	1.98	0.15	0	19.57	9.29	10.84	4.09	2.14	0.2	0.05	2.27	2.93	1.96	1.48	1.14	0	45.02	62.43
100 uE	Chlamy	40	1.77	3.75	2.34	1.62	0.1	0	0	4.61	9.07	5.36	4.72	3.74	0.69	0.08	7.13	8.53	4.99	1.06	43.54	25.08	20.32	6.75	3.24	0.28	0	6.58	2.6	13.47	3.28	0.97	0	0	10.99	3.11	4.65	1.44	0.69	0.09	0	1.22	1.83	0	0	0	0	59.44	62.33
100 uE	Chlamy	40	0.88	1.36	1.2	0.19	0.05	0.08	0	6.24	4.54	1.82	0.76	0.42	0.78	0.1	1.59	6.57	4.46	0.64	20.39	16.13	27.19	5.19	3.27	0.08	0.04	4.33	3.16	0	2.55	4.16	0.14	0	6.39	3.51	4.54	2.17	1.03	0.1	0.02	2.42	0.68	1.86	0.7	1.39	0	69.46	35.01
100 uE	Sorokiniana	0	37.07	0	0	0	0	0	0	124.37	0	0	0	0	0	0	60.18	0.09	0	0	600.14	0	0	0	0	0	0	144.87	0.01	0	0	0	0	0	160.71	0.57	0	0	0	0	0	58.34	0	0	0	0	0	2552.76	2.53
100 uE	Sorokiniana	0	22.77	0	0	0	0	0	0	86.19	0.91	0	0.41	0.23	0.23	0	77.93	0.2	0	0	946.04	0	0	0	0	0	0	301.71	0	4.21	0	0	0	0	201.59	0	0	0	0	0	0	104.28	0	0	0	0	0	1949.55	25.56
100 uE	Sorokiniana	0	33.36	0	0.09	0	0	0	0	109.72	0	0	0.17	0	0	0	55.96	0	0	0	666.54	0	0	0	0	0	0	157.8	2.77	0	0	0	0	0	109.48	0.23	0	0	0	0	0	64.17	0	0	0	0	0	1872.25	6.02
100 uE	Sorokiniana	5	20.26	1.87	0	0	0	0	0	130	26.27	2.09	0.14	0.65	0.32	0.1	70.25	16.74	1.41	0	483.1	32.75	16	0	0	0	0	159.35	25.91	11.12	0	0.13	0	0	109.46	17.82	2.55	0.04	0	0	0	88.6	10.19	0	1.2	0	0	4164.28	290.67
100 uE	Sorokiniana	5	30.12	0	0.08	0	0	0	0	50.58	12.77	0	0.84	0	0	0	43.52	3.98	0.14	0	527.69	20.51	0	0	0	0	0	113.85	5.21	5.11	0	0	0	0	90.53	5.66	0.18	0	0.02	0	0	31.56	2.06	0	1.82	0	0	1494.25	125.65
100 uE	Sorokiniana	5	17.83	0	0	0.03	0	0	0	36.99	7.25	1.78	0.87	0	0	0	23.6	1.62	0.75	0.44	288.79	12.93	9.29	0	0.19	0	0	55.14	5.81	6.73	0	0.17	0	0	77.48	0	0.92	0	0.05	0	0	10.02	0.47	0.29	0	0	0	951.72	77.78
100 uE	Sorokiniana	10	15.99	0.95	0	0	0.15	0	0	35.82	17.64	0	0.27	0.06	0	0	45.44	14.2	0	0.54	534.83	35.49	9.81	0	0.65	0	0	153.02	38.4	15.33	0	0.03	0	0	106.2	21.72	5.38	0	0.01	0	0	41.63	10.26	0	0	0	0	1863.44	389.77
100 uE	Sorokiniana	10	30.18	6.17	0.62	0	0	0	0	154.85	82.35	17.74	0	0	0.37	0	66.82	31.53	4.15	0	280.32	46.55	22.83	1.97	0	0	0	57.56	32.87	18.13	0.93	0.26	0.35	0	66.61	27.63	11.48	0.63	0.06	0	0	79.36	22.61	2.03	0	0	0	3389.07	799.06
100 uE	Sorokiniana	10	19.54	1.63	0.44	0	0	0	0	50.83	37.93	6.35	0.3	0	0.14	0	64.05	31.92	1.96	0	463.02	60.35	21	0	0.35	0	0	142.26	50.48	19.8	0.68	0.24	0	0	110.26	33.8	10.22	0	0	0	0	42.88	15.82	2.63	0.74	0.11	0	2579.32	693.85
100 uE	Sorokiniana	20	25	4.25	0.47	0	0	0	0	32.99	24.97	9.91	0.13	0	0.29	0.37	34.66	18.09	3.21	0	388.14	53.07	19.95	0.15	0	0	0	73.57	32.89	12.04	1.39	1.11	0	0	87.65	25.27	10	0.75	0.14	0	0	22.76	14.23	5.29	0.74	0.71	0	1244.07	681.1
100 uE	Sorokiniana	20	20.11	6.47	2.53	0	0	0	0	67.35	63.11	26.98	4.41	0.74	0.05	0.08	58.18	40.92	4.22	0.83	417.15	104.17	83.83	4.64	3.5	0.56	0.13	114.37	60.6	55.85	2.84	2.32	0.36	0	77.77	33.34	21.48	4.15	0.6	0.04	0	51.64	38.36	8.61	2.66	1.08	0	2332.78	1579.34
100 uE	Sorokiniana	20	25.75	8.89	4.71	0.37	0	0	0	128.57	89.16	30.46	3.1	0.53	0.74	0	81.34	48.13	2.29	0	445.61	175.6	86.23	7.68	4.23	0	0	137.4	78.3	9.91	8.85	1.85	0.05	0	112.19	59.09	24.67	3.81	0.38	0.01	0.05	121.34	53.45	9.34	1.21	0.31	0	3321.49	1441.86
100 uE	Sorokiniana	40	12.02	4.76	6.87	1.34	1.51	0	0.06	36.79	53.03	45.17	16.84	7.99	0.98	0.29	30.3	40.88	7.38	5.53	226.95	112.49	136.1	33.2	20.92	3.46	0.97	55.58	46.55	61.79	18.41	11.41	1.58	1.23	48.95	34.53	33.74	11.28	7.14	1.18	0.5	25.18	34.06	14.06	11.18	2.43	0.03	1052.09	1370.18
100 uE	Sorokiniana	40	24.09	11.84	9.83	2.99	1.43	0	0	45.4	57.01	33.46	11.19	3.91	0.83	0.42	36.96	54.93	10.6	3.25	255.79	98.32	104.67	27.82	15.26	2.56	0.48	54.77	36.39	45.15	13.7	8.01	0.79	0.62	77.52	0	43.37	13.05	6.06	1.2	0.12	43.67	39.72	16.01	8.33	2.43	0.06	951.1	771
100 uE	Sorokiniana	40	28.62	8.46	6.48	2.17	0.46	0.66	0	38.47	48.5	29.87	8.04	4.69	1.35	0	35.79	30.37	11.64	2.47	284.63	84.15	73.24	22.45	9.59	1.67	0	53.96	26.22	28.51	8.98	4.6	0	0	83.08	40.37	29.09	10.2	2.79	0.44	0	23.13	25.91	14.59	3.9	0.71	0	866.61	986.36
100 uE	Ohadii	0	11.01	0	0	0	0	0	0	87.3	0.07	0	0	0	0	0.14	93.86	0.33	0	0	329.19	0	0	0	0	0	0	73.79	1.36	0	0	0	0	0	77.12	0.24	0	0	0	0	0	39.08	0	0.48	0	0	0	351.06	3.07
100 uE	Ohadii	0	23.65	0	0.55	0	0	0	0	126.18	0.84	0.08	0	0	0	0	92.34	0	0	0	227.74	0	0.05	0.08	0	0	0	48.05	0.27	0.57	0	0	0	0	65.82	0	0	0	0	0	0	34.98	0	0	0	0	0	433.37	3.42
100 uE	Ohadii	0	11.5	0.01	0.16	0	0	0	0	108.47	0	0	0.09	0	0	0	127.78	0	0	0	393.14	0	0	0	0	0	0	107.82	0	0	0	0	0	0	79.79	0	0	0	0	0	0	51.48	0.2	0	0	0	0	433.14	1.76
100 uE	Ohadii	5	19.38	1.43	0.23	0.2	0	0	0	47.28	23.32	2.94	0.15	0	0	0	45.4	13.81	4.28	0	182.27	17.87	10.09	0.95	0.93	0	0	33.85	8.16	5.21	0	0	0	0	41.95	5.82	1.67	0	0.09	0	0	14.19	7.8	0.59	0	0	0	589.39	114.74
100 uE	Ohadii	5	15.86	1.19	0.27	0.01	0	0	0	31.2	21.64	3.66	0	0.01	0.1	0	75.85	27.54	0.27	0.06	262.13	29.43	0	0.4	0.6	0	0	72	13.68	13.53	0	0	0	0	67.26	8.65	2.07	0	0	0	0	59.98	6.84	0	0	0	0	545.85	120.48
100 uE	Ohadii	5	13.01	1.07	0.84	0	0	0	0	43.61	24.42	2.72	0	0	0.16	0.15	78.01	22.39	0.08	0	221.15	30.89	10.46	0	0.14	0	0	63.19	15.64	12.26	0	0	0	0	49.11	9.25	1.33	0.08	0	0	0	27.58	6.89	0	0.73	0	0	418.43	99.95
100 uE	Ohadii	10	9.56	1.69	0.32	0.05	0	0	0	20.6	16.79	9.99	1.11	0.49	0.05	0.36	33.81	27.79	4.09	1.29	162.55	34.82	39.81	0.27	1.59	0	0	44.73	16.97	32.46	2.2	1.07	0	0	46.58	12.76	7.74	0.95	0.2	0	0	10.05	7.06	3.91	0	0	0	239.35	145.12
100 uE	Ohadii	10	7.95	1.87	0.52	0.27	0.45	0	0	18.25	16.07	5.98	0.94	0.2	0	0	41.62	31.14	4.32	0	158.33	37.29	32.31	0.52	2.1	0.05	0	37.28	16.49	14.94	1.44	0.65	0	0	52.17	11.78	4.62	1.52	0.26	0	0	19.85	12.93	3.06	0	0	0	250.1	146.17
100 uE	Ohadii	10	8.96	1.7	1.5	0	0	0	0	18.67	18.07	7.14	0.85	0.23	0	0.17	42.25	24.44	4.29	0.21	151.76	41.28	50.65	0.76	0.26	0.04	0	42.16	16.14	22.91	0	0.35	0.09	0	40.61	9.95	5.8	0.26	0.26	0.01	0	17.1	10.85	5.1	0.11	0.65	0	321.87	182.43
100 uE	Ohadii	20	6.65	0.93	0.69	1.04	0.52	0	0	14.72	22.85	18.46	8.11	3.29	0	0.14	28.01	30.68	11.97	3.74	166.41	33.79	31.84	8.76	3.54	0.71	0	43.4	26.49	48.11	10.81	6.97	1.8	0.05	46.58	20.82	23.8	11.66	6.05	0.15	0.21	8.79	7.38	4.58	0.35	1.21	0.49	164.87	146.57
100 uE	Ohadii	20	7.68	0.68	1.69	0.69	0	0	0	21.18	25.44	23.37	10.15	1.2	0.35	0.16	31.07	30.17	8.21	2.3	162.99	31.01	37.75	7.74	3.99	1.37	0	29.21	13.52	31	7.67	4.9	0.06	0.05	44.49	0	23.45	11.6	4.69	0.65	0.4	5.19	4.79	3.13	2.93	0.61	0	101.83	140.39
100 uE	Ohadii	20	7.81	1.68	1.15	0.49	0.4	0	0	13.55	19.65	18.73	8.69	2.2	0.5	0	36.52	46.13	11.91	4.33	193.02	36.32	44.43	6.66	3.78	0.12	0.31	40.68	27.4	45.38	12.44	9.37	1.3	0.36	35.27	13.3	14.87	6.62	1.97	0.35	0.02	10.71	9.36	6.2	2.98	0.13	0	191.38	258.24
100 uE	Ohadii	40	14.9	2.29	3.96	3.62	3.14	0.95	0.56	24.52	23.32	35.75	32.39	24.81	8.56	4.49	38.36	45.15	29.17	21.48	222.18	43.44	83.14	32.73	34.53	11.4	6.32	44.13	27.53	68.83	51.56	46.1	18.22	7.3	36.52	19.43	29.76	28.36	24.86	10.49	3.7	4.29	5.41	10.97	7.67	4.07	0.4	129.31	172.19
100 uE	Ohadii	40	13.95	1.35	3.72	4.12	3.04	1.24	0.21	16.89	21.32	29.52	24.68	16.58	10.58	1.99	31.24	43.02	27.12	15.35	171.52	37.31	64.26	41.95	37.57	15.92	8.07	41.18	22.64	51.45	41.25	31.87	11.16	6.97	53.32	17.73	27.3	26.41	23.27	8.47	2.85	5.37	8.46	7.05	5.92	3.35	2.43	89.1	111.83
100 uE	Ohadii	40	14.42	1.82	3.84	3.87	3.09	1.1	0.39	20.7	22.32	32.64	28.53	20.69	9.57	3.24	34.8	44.08	28.15	18.42	196.85	40.38	73.7	37.34	36.05	13.66	7.19	42.66	25.08	60.14	46.41	38.99	14.69	7.13	29.56	9.66	15.79	19.71	19.32	10.75	5.35	4.83	6.93	9.01	6.8	3.71	1.42	109.21	142.01
3000 uE	Ohadii	0	55.09	0	0	0	0	0	0	332.49	1.19	0	0	0.27	0.17	0	186.2	0.68	0	0	745.55	0	0	0	0	0	0	441.98	0	0	0	0	0	0	283.32	0	0	0	0	0	0	183.86	0	0	0	0	0	5142.03	73.89
3000 uE	Ohadii	0	24.77	0	0.08	0	0	0	0	286.51	0	0	0.28	0.03	0.18	0.2	150.84	0.11	0	0	493.75	0	0	0	0	0	0	283.53	0.17	0	0	0	0	0	178.52	0	0	0	0	0	0	124.11	0.09	0	0	0	0	4600.51	37.02
3000 uE	Ohadii	0	35.86	0	0	0	0	0	0	374.79	2.55	0	0	0	0	0	156.72	0.24	0	0	340.86	2.72	2.37	0	0	0	0	188.68	0	0.4	0.5	0	0	0	207.71	0	0	0	0	0	0	95.4	0	2.14	0	0	0	3548.02	0
3000 uE	Ohadii	5	31.35	4.37	1.35	0.12	0	0	0	177.44	99.27	13.03	1.97	0	0	0.22	158.39	53.06	0.23	0.46	420.8	57	40.77	0	0	0	0	162.57	100.67	39.95	1.79	0.93	0	0	102.64	48.88	12.74	0.65	0	0	0	110.89	41.84	10.86	0.03	0	0	3981.76	1333.23
3000 uE	Ohadii	5	29.78	4.33	0.29	0	0	0	0	201.01	79.64	7.96	0.13	0.16	0	0	81.79	26.64	1.96	0	328.19	39.66	16.08	0	0.41	0.13	0	76.48	36.63	17.17	0	0	0	0	104.3	36.92	7.62	0	0.17	0	0	63.73	11.44	3.15	0.53	0.49	0	2614.53	424.49
3000 uE	Ohadii	5	31.4	5	0.75	0	0	0.12	0	286.48	104.75	21.18	0	0.14	0.18	0	128.32	46.64	1.12	0	473.54	92.97	31.42	0.03	0.49	0	0	176.2	80.77	0	2.96	1.02	0	0	115.28	43.26	11.52	0	0	0	0	128.47	33.73	8.57	1.12	0.33	0.26	4040.76	697.88
3000 uE	Ohadii	10	34.38	8.98	3.41	0	0	0	0	150.82	130.78	52.32	1.45	0.64	0.27	0.04	97.7	91.92	2.69	1.57	419.75	91.97	50.75	3.72	0.08	0.82	0	139.58	127.33	8.71	12.38	5.13	0.24	0	81.29	53.31	27.45	4.04	0.77	0	0	75.9	47.24	14.11	1.7	1.26	0.17	3588.66	1906.66
3000 uE	Ohadii	10	34.89	8.22	6.26	0	0	0	0	184.1	133.22	34.47	2.25	1.21	0.05	0.12	68.49	34.67	3.85	0	344.26	135.77	65.04	0.92	0.73	0	0	72.97	51.91	31.1	2	0.8	0	0	100.56	57.16	26.17	2.93	0.27	0	0.09	34.03	17.49	4.94	0.42	0.22	0	1968.22	851.32
3000 uE	Ohadii	10	41.36	11.4	5.6	0.08	0	0	0	257.14	189.2	65.35	4.5	0.92	0.48	0	126.55	84.22	6.49	0.08	555.19	203.79	94.48	9.12	1.65	0	0.12	186.82	170.45	92.62	9.81	1.03	0.34	0	160.75	105.2	55.19	4.29	1.36	0.09	0.07	114.2	53.94	17.7	3.54	0.25	0	3879.8	1856.78
3000 uE	Ohadii	20	29.01	10.83	11.58	1.76	0.4	0	0	97.68	162.02	112.86	35.53	14.14	2.72	0.48	40.89	50	13.37	2.36	211.34	85.83	84.81	18.67	8.83	0.55	0	44.52	51.07	69.5	22.31	12.19	2.13	0.37	58.06	53.41	52.27	23.05	12.56	0.66	0.55	22.15	38.25	19.72	14.84	3.3	0	1230.53	1791.5
3000 uE	Ohadii	20	37.82	11.34	11.46	2.16	0	0.06	0	163.55	200.97	117.12	26.03	9.18	1.28	0	64.43	70.5	13.8	2.04	374.47	196.18	134.22	34.21	10.64	3.33	0.52	83.94	87.65	78.33	26.17	8.73	1.58	0.36	69.04	71.33	56.28	15.5	7.04	1.44	0	32.43	50.53	26.66	11.51	2.34	0.44	1728.82	1770.12
3000 uE	Ohadii	20	24.12	9.93	6.09	1.08	0.42	0.14	0.02	118.91	135.06	73.75	23.7	6.42	0	0.33	62.84	57.37	8.94	2.94	380.76	205.9	168.34	35.98	14.98	1.37	0.59	109.63	114.73	101.29	27.86	10.57	1.16	0.29	74.63	64.43	50.96	14.34	5.36	0.64	0.1	43.65	42.33	30.89	7.41	0.83	0.43	1427.05	1510.3
3000 uE	Ohadii	40	18.15	6.75	13.87	9.92	9.13	0.83	0.57	46.45	111.06	117.59	82.64	54.37	12.73	4.55	35.47	62.96	27.67	19.29	134.65	67.98	101.66	66.13	59.27	19.11	5.29	31.12	26.8	64.52	48.57	37.68	15.48	5.59	49.21	40.78	63.41	50.72	0	16.56	6.07	7.05	25.25	30.46	24.37	10.05	1.31	509.92	1108.76
3000 uE	Ohadii	40	20.37	9.67	17.74	8.05	10.9	2.96	0.39	53.55	106.08	124.86	75.33	51.6	20.78	7.28	34.91	60.43	25.18	20.46	217.47	123.62	165.88	100.61	87.07	31.78	10.54	35.62	37.62	70.68	50.4	41.26	13.73	6.95	63.46	52.19	87.97	54.98	40.79	0	9.15	10.52	26.61	24.31	24.25	7.32	1.18	642.89	1039.88
3000 uE	Ohadii	40	15.88	10.06	14.88	9.5	7.57	3.49	1.2	42.43	72.06	82.67	61.38	45.83	13.48	8.04	33.86	56.51	30.53	22.11	214.16	122.5	178.13	110.91	96.63	36.36	14.12	37.1	31.49	62.76	37.18	41.29	15.29	5.25	58.43	46.41	67.72	45	45.51	12.75	7.36	9.01	17.45	24.01	18.03	12.64	3	538.32	663.78
[truncated: 44 more columns]

## Sheet: metabolite content
Metabolite content entering model fit and metabolite turnover calculations. The data obtained from Treves et al. are given in units nmol/gDW.
Light	Alga	Labeling time (sec)	ADPG	FBP	SBP	DHAP	G6P	F6P	G1P	R5P	PP	RuBP	UDPG	2PG	R5P	S7P
100 uE	Chlamy	0	6.59399	19.934	40.7772	12.8043	61.5551	12.9198	16.5081	3.6472	3.11616	95.4951	27.9819	2.41359	3.6472	36.2461
100 uE	Chlamy	0	5.60804	17.4707	32.2787	16.9042	71.0938	22.056	15.6918	3.96185	5.96021	115.244	21.2237	3.53134	3.96185	25.3655
100 uE	Chlamy	0	3.59452	16.4225	34.2664	10.5983	56.6418	9.52416	16.138	1.22848	1.62276	97.3546	23.6521	3.01836	1.22848	31.2562
100 uE	Chlamy	5	3.21342	19.9296	28.5347	10.9881	35.4877	8.67271	13.9176	1.67271	2.94976	125.721	18.0778	3.00056	1.67271	21.1707
100 uE	Chlamy	5	3.45252	21.0828	23.5111	21.3044	58.4936	19.206	15.8269	5.47465	5.80897	116.514	19.7222	3.63447	5.47465	21.5611
100 uE	Chlamy	5	2.31406	11.4696	14.9599	9.58016	31.5892	7.03271	13.2038	0.437067	1.64965	71.1352	14.8364	1.15077	0.437067	21.9773
100 uE	Chlamy	10	6.13842	38.0305	60.6037	22.3688	105.584	35.2469	19.9945	4.98226	6.99486	240.04	26.6517	2.78173	4.98226	31.8189
100 uE	Chlamy	10	6.03935	34.3146	40.1602	13.6293	54.2993	18.3802	14.774	1.93773	2.45517	153.024	28.0696	2.89091	1.93773	26.3104
100 uE	Chlamy	10	4.1482	26.6462	33.9894	14.2085	56.0909	14.3352	13.4509	4.03878	2.14342	133.711	28.6533	2.96094	4.03878	27.9311
100 uE	Chlamy	20	6.51336	21.2626	28.2808	26.2515	123.717	46.9665	26.666	6.13687	7.91444	162.958	32.2395	4.29564	6.13687	45.5714
100 uE	Chlamy	20	7.66945	31.7616	61.4768	24.4353	126.748	27.3747	15.8875	8.08727	7.81071	213.154	32.2273	2.73357	8.08727	25.816
100 uE	Chlamy	20	4.92486	20.9893	34.6572	13.8886	53.4795	14.668	8.27318	2.20202	4.03984	122.031	26.7203	5.84527	2.20202	16.4623
100 uE	Chlamy	40	3.34105	10.8194	16.8899	15.7536	65.9551	24.2134	23.0116	2.38828	4.87543	94.2591	25.8216	2.05997	2.38828	28.1971
100 uE	Chlamy	40	4.77514	14.0864	14.792	10.8207	49.4301	13.4001	10.4447	1.87776	1.51646	99.8954	26.5386	2.15895	1.87776	20.4856
100 uE	Chlamy	40	1.86808	7.29883	8.22281	6.60751	36.0187	7.14794	8.84615	2.77347	3.51433	73.0182	8.71733	1.20561	2.77347	12.4992
100 uE	Sorokiniana	0	20.158	67.6273	59.8693	32.7725	326.34	78.7811	87.6998	11.5832	31.7225	1389.5	94.3059	4.64975	11.5832	99.7346
100 uE	Sorokiniana	0	12.3844	47.8327	52.1388	42.7962	514.434	166.354	109.62	28.5488	56.7034	1074.01	71.8783	7.24288	28.5488	99.7176
100 uE	Sorokiniana	0	18.1905	59.758	59.6877	30.4306	362.446	87.3153	59.6569	11.6487	34.8964	1021.71	89.1886	6.18071	11.6487	76.6443
100 uE	Sorokiniana	5	12.0351	86.769	35.4075	48.0659	289.21	106.859	70.6249	18.7785	54.3681	2424.39	74.5782	13.7427	18.7785	48.216
100 uE	Sorokiniana	5	16.4212	34.9043	41.0682	25.9015	298.095	67.5207	52.418	10.1834	19.2714	881.546	73.1701	5.38642	10.1834	62.2581
100 uE	Sorokiniana	5	9.71268	25.4988	14.7507	14.3634	169.226	36.8922	42.6544	3.85227	5.86093	563.071	41.3847	1.98978	3.85227	40.7593
100 uE	Sorokiniana	10	9.29134	29.2558	30.5875	32.7241	315.817	112.441	72.4917	12.0836	28.2203	1237.09	44.1557	4.47379	12.0836	51.8889
100 uE	Sorokiniana	10	20.1057	138.833	41.1552	55.7361	191.229	59.8678	57.8611	18.3163	56.549	2355.53	82.2449	9.06194	18.3163	66.3456
100 uE	Sorokiniana	10	11.7527	51.9542	28.0954	53.2539	296.208	116.075	83.8939	14.4718	33.8122	1825.88	61.5589	6.46795	14.4718	56.452
100 uE	Sorokiniana	20	16.1624	37.3416	30.3358	30.4283	250.852	65.8014	67.3278	11.9536	23.7754	1137.15	60.2265	4.99165	11.9536	52.3811
100 uE	Sorokiniana	20	15.8327	88.4845	28.6721	56.6347	333.867	128.519	74.7054	20.8946	55.6542	2428.79	58.3468	10.0838	20.8946	64.7693
100 uE	Sorokiniana	20	21.5955	137.336	34.9411	71.649	391.16	128.523	108.867	31.262	100.949	2812.16	70.6305	4.57138	31.262	94.5062
100 uE	Sorokiniana	40	14.4431	87.5963	22.4544	45.725	290.416	106.88	74.6783	16.4737	47.2737	2003.44	54.1782	11.5832	16.4737	64.4373
100 uE	Sorokiniana	40	27.287	82.7884	24.0166	57.4979	274.555	86.6846	76.8434	28.2414	59.942	1225.4	75.6802	7.01321	28.2414	103.366
100 uE	Sorokiniana	40	25.4711	71.1982	37.9733	43.6478	258.693	66.4892	90.252	15.0969	37.1073	1449.18	81.7905	10.449	15.0969	77.9238
100 uE	Ohadii	0	5.42642	43.1324	35.1283	46.4213	162.243	37.0397	38.1255	15.7171	19.4977	175.375	90.5657	2.47456	15.7171	24.3464
100 uE	Ohadii	0	11.926	62.6422	51.4155	45.5095	112.303	24.0991	32.4403	16.0466	17.2419	215.27	130.166	4.53861	16.0466	42.412
100 uE	Ohadii	0	5.7479	53.5069	51.2767	62.9771	193.763	53.1372	39.324	14.0056	25.4726	214.342	89.0922	1.89975	14.0056	27.8968
100 uE	Ohadii	5	10.4657	36.3219	33.2365	31.2908	104.539	23.2736	24.4094	13.7745	11.1279	353.715	101.487	3.47169	13.7745	20.8487
100 uE	Ohadii	5	8.54542	27.9027	26.0854	51.1178	144.192	48.8956	38.4276	24.7499	32.9329	335.912	114.465	4.9242	24.7499	20.8861
100 uE	Ohadii	5	7.35593	35.0243	20.3737	49.5217	129.442	44.8934	29.4641	9.14398	17.3472	261.805	91.5464	2.50591	9.14398	20.1803
100 uE	Ohadii	10	5.72516	24.3468	21.1774	33.0126	117.816	48.0255	33.6309	10.5559	10.3657	227.12	85.5917	5.53529	10.5559	39.2065
100 uE	Ohadii	10	5.44871	20.4249	18.7176	37.9888	113.657	34.8925	34.6739	13.0204	17.6622	221.462	77.3246	2.22827	13.0204	30.604
100 uE	Ohadii	10	5.98744	22.2397	24.2799	35.0874	120.626	40.2437	28.0366	12.0279	16.6582	272.271	83.3719	3.28298	12.0279	31.7481
100 uE	Ohadii	20	4.84523	33.306	36.489	36.6689	120.773	67.83	53.8572	11.6288	11.2418	240.101	100.325	3.38614	11.6288	76.0671
100 uE	Ohadii	20	5.29491	40.3373	56.012	35.3627	120.672	42.5914	42.0279	6.65651	8.20483	201.279	118.273	3.62674	6.65651	95.0365
100 uE	Ohadii	20	5.6853	31.2052	27.096	48.7347	140.291	67.4841	35.6783	13.0411	14.479	331.402	98.6447	2.98119	13.0411	62.0559
100 uE	Ohadii	40	14.504	75.8177	64.4681	66.1213	213.773	129.949	75.4714	12.1867	16.169	390.667	140.111	7.14862	12.1867	153.43
100 uE	Ohadii	40	13.6182	59.912	63.2854	57.5292	185.609	101.781	78.5335	15.2826	16.0571	255.914	135.626	1.76973	15.2826	134.219
100 uE	Ohadii	40	14.0611	67.8648	63.8767	61.8252	199.691	115.865	54.2777	13.7346	16.1131	323.291	122.438	1.60188	13.7346	138.493
3000 uE	Ohadii	0	18.661	113.184	91.9415	63.3046	252.557	149.722	95.9752	32.893	62.2819	1766.91	81.1442	12.7556	32.893	121.754
3000 uE	Ohadii	0	8.4179	97.291	74.922	51.1375	167.261	96.1036	60.4746	25.8686	42.0715	1571.17	44.383	12.0324	25.8686	65.2181
3000 uE	Ohadii	0	12.1468	127.823	80.7649	53.1704	117.19	64.2203	70.3618	21.1709	33.0427	1201.9	66.2298	14.275	21.1709	105.198
3000 uE	Ohadii	5	12.597	98.8914	68.437	71.8614	175.669	103.627	55.8664	29.1235	55.4266	1867.81	56.7612	9.35544	29.1235	66.1129
3000 uE	Ohadii	5	11.6508	97.8658	38.1427	37.3964	130.241	44.1329	50.4763	13.4655	26.8751	1041.98	54.2201	13.9091	13.4655	67.5034
3000 uE	Ohadii	5	12.6283	139.814	55.9894	59.6469	202.726	88.3971	57.6084	29.755	58.4297	1634.87	58.0954	10.7404	29.755	61.5006
3000 uE	Ohadii	10	15.8424	113.931	48.8665	65.6815	192.108	99.3791	56.528	22.6525	47.5558	2030.41	52.1714	12.5692	22.6525	63.8811
3000 uE	Ohadii	10	16.7238	120.405	48.8042	36.2478	185.199	53.7883	63.4071	14.9919	19.3411	1030.2	63.9343	11.2884	14.9919	95.7687
3000 uE	Ohadii	10	19.7978	175.335	60.4899	73.6229	292.8	156.19	110.76	35.1489	64.2377	2135.85	70.9597	20.1019	35.1489	118.739
3000 uE	Ohadii	20	18.1486	144.112	72.5164	36.1144	138.899	68.4532	67.9353	19.1767	33.2842	1468.52	62.6127	13.991	19.1767	118.355
3000 uE	Ohadii	20	21.2864	175.512	82.9699	51.0724	255.276	97.1416	74.7389	29.8924	41.9736	1535.48	75.61	13.0095	29.8924	154.548
3000 uE	Ohadii	20	14.1565	121.331	65.4378	44.7454	273.684	123.826	71.2941	25.6693	42.5267	1318.58	57.83	17.735	25.6693	118.717
3000 uE	Ohadii	40	20.0583	145.457	70.0817	49.2527	153.824	77.8334	76.8145	19.1842	33.3618	1354.34	69.2126	14.5059	19.1842	157.102
3000 uE	Ohadii	40	23.7448	148.879	63.8782	47.7551	249.654	86.8077	104.519	21.3945	31.9101	1306.94	93.2298	15.7318	21.3945	190.255
3000 uE	Ohadii	40	21.1994	110.394	79.5799	48.4451	261.79	78.0339	95.9298	20.464	28.5022	943.583	92.7808	11.8214	20.464	179.812

## Sheet: exchange rates
Rates of starch and sucrose synthesis used in model fit. We assumed the error to be 30% of measured value. Units nmol C eq. g-1 DW-1.
light	algae	starch synthesis	sucrose synthesis
100 uE	Chlamy	19	1e-07
100 uE	Sorokiniana	61	17
100 uE	Ohadii	85	35
3000 uE	Ohadii	74	61
