# Supplementary material for: A simulation-free constrained regression approach for flux estimation in isotopically nonstationary metabolic flux analysis with applications in microalgae
Source: Front Plant Sci. 2023 Nov 23;14:1140829. doi: 10.3389/fpls.2023.1140829 (PMC10702240; doi:10.3389/fpls.2023.1140829)
Supplement: Supplementary file 4 [file Table_3.xlsx]

## Sheet: S3
Table S3. Comparison of flux estimation for C. reinhardtii and C. sorokiniana obtained from two model variants. (1) a simple CBC model considering no compartmentation and (2) a compartmented model of CBC and adjacent pathways. For a full list of model reactions and a list of abbreviations see Supplementary Files S1 and S2.
Comparison of flux ranges for CBC reactions estimated from 'simple CBC model' and 'compartmented CBC model'. Data relate to Figure 2 main text.
	simple CBC model							compartmented CBC model
	C. reinhardtii			C. sorokiniana				C. reinhardtii			C. sorokiniana
Reaction shared between models	best	LB	UB	best	LB	UB		best	LB	UB	best	LB	UB
'T_CO2'	3.01073	1.42794	3.36342	4.91951	2.94043	8.32018		1.92595	0.552505	2.23354	4.49779	2.38959	8.56998
'RUBISCO_CO2'	3.01073	1.42794	3.36342	4.91951	2.94043	8.32018		1.92595	0.60411	2.23354	4.49779	2.38959	8.56998
'RUBISCO_O2'	0.370628	2.45469e-17	1.22639	2.09287e-18	2.7326e-23	9.16154e-12		1.52307e-08	2.27409e-16	0.617188	2.25932e-15	1.24865e-17	2.37904e-08
'GAPDHp'	6.39209	2.91729	7.58594	9.83902	5.88086	16.6404		3.8519	1.25836	4.6512	8.99559	4.77917	17.14
'FBAp'	1.50536	0.71397	1.68171	2.45976	1.47021	4.16009		0.962974	0.310674	1.11677	2.2489	1.19479	4.16999
'PFPp'	1.50536	0.71397	1.68171	2.45976	1.47021	4.16009		0.962974	0.310674	1.11677	2.2489	1.19479	4.16999
'TK3'	1.12712	0.495164	1.41786	1.63984	0.980143	2.77339		0.641983	0.209727	0.799613	1.49926	0.796528	2.85666
'ALD'	1.12712	0.495164	1.41786	1.63984	0.980143	2.77339		0.641983	0.209727	0.799613	1.49926	0.796528	2.85666
'SBPase'	1.12712	0.495164	1.41786	1.63984	0.980143	2.77339		0.641983	0.209727	0.799613	1.49926	0.796528	2.85666
'TK1'	2.25424	0.990329	2.83572	3.27967	1.96029	5.54679		1.28397	0.419454	1.59923	2.99853	1.59306	5.71332
'TK2'	1.12712	0.495165	1.41786	1.63984	0.980143	2.77339		0.641983	0.209727	0.799613	1.49926	0.796528	2.85666
'PPI'	1.12712	0.495164	1.41786	1.63984	0.980143	2.77339		0.641983	0.209727	0.799613	1.49926	0.796528	2.85666
'PRK'	3.38136	1.48549	4.25358	4.91951	2.94043	8.32018		1.92595	0.629181	2.39884	4.49779	2.38959	8.56998
'PGIp'	0.378246	0.00506207	0.480167	0.819919	0.490071	1.3867		0.320991	0.0372165	0.372257	0.749632	0.288945	1.30255
'PGMp'	0.378246	0.00506207	0.480167	0.819919	0.490071	1.3867		0.320991	0.0372165	0.372257	0.749632	0.288945	1.30255
'AGP'	0.378246	0.00506207	0.480167	0.819919	0.490071	1.3867		0.320991	0.0372165	0.372257	0.749632	0.288945	1.30255
'SS'	0.378246	0.00506207	0.480167	0.819919	0.490071	1.3867		0.320991	0.0372165	0.372257	0.749632	0.288945	1.30255
