# Supplementary material for: A simulation-free constrained regression approach for flux estimation in isotopically nonstationary metabolic flux analysis with applications in microalgae
Source: Front Plant Sci. 2023 Nov 23;14:1140829. doi: 10.3389/fpls.2023.1140829 (PMC10702240; doi:10.3389/fpls.2023.1140829)
Supplement: Supplementary file 5 [file Table_4.xlsx]

## Sheet: S4
Table S4. Net flux estimates obtained at best fit by proposed regression approach and INCA for three algae under LL condition.
Flux is estimated using the compartmented CBC model (see also Supplementary File S2) and given in units nmol gDW-1 s-1.
		1	2	3	4	5	6	7	8	9	46	47	48	49	50	51	52	53	54	55	56	57	58	59	60	61	62	63
		regression approach (pool size fixed, compartmentation sampled)									INCA (all possible MIDs)									INCA (7 MIDs used in regression only)
Reaction abbreviation	Reaction equation	C. reinhardtii	95% CI		C. sorokiniana	95% CI		C. ohadii	95% CI		C. reinhardtii	95% CI		C. sorokiniana	95% CI		C. ohadii	95% CI		C. reinhardtii	95% CI		C. sorokiniana	95% CI		C. ohadii	95% CI
Calvin-Benson-Basham cycle			LB	UB		LB	UB		LB	UB		LB	UB		LB	UB		LB	UB		LB	UB		LB	UB		LB	UB
		1.92595	0.552505	2.23354	4.49779	2.38959	8.56998	6.66682	1.1684	10.3438	111.171	47.0445	3609.25	499.779	254.184	763.24	899.698	422.797	1366.06	113.172	50.2972	NaN	1532.29	316.489	2.74476e+06	912.027	NaN	NaN
		1.92595	0.60411	2.23354	4.49779	2.38959	8.56998	6.66682	1.1684	10.3438	111.171	47.0417	900386	503.574	253.499	833.939	899.699	421.337	1297.91	113.172	50.2915	NaN	1532.29	326.383	2.06606e+06	912.028	NaN	NaN
		1.52307e-08	2.27409e-16	0.617188	2.25932e-15	1.24865e-17	2.37904e-08	2.38661e-16	1.33786e-16	5.27318e-09	8.75103e-06	-4.26326e-14	22.9704	7.5902	-7.68807e-12	282.045	0.000838519	-4.26326e-14	53594.5	4.03888e-06	-3.55271e-14	1113.53	2.45827e-06	5.12543e-10	1.4656e+06	0.00127599	NaN	NaN
		3.8519	1.25836	4.6512	8.99559	4.77917	17.14	13.3336	2.3368	20.6876	222.337	94.0793	NaN	1018.53	508.267	1926.6	1799.39	845.924	2731.67	226.303	100.854	2.81837e+06	2722.65	633.657	4.00411e+06	1824.06	NaN	NaN
		0.962974	0.310674	1.11677	2.2489	1.19479	4.16999	2.22227	0.402887	3.48017	55.5828	23.5251	89.9102	219.711	125.331	411.494	381.586	170.546	586.207	56.5656	25.2033	2951.74	561.214	132.036	757043	387.432	NaN	NaN
		0.962974	0.310674	1.11677	2.2489	1.19479	4.16999	2.22227	0.402887	3.48017	55.5828	23.5251	89.9102	219.711	125.331	411.494	381.586	170.546	586.207	56.5656	25.2033	2951.74	561.214	132.036	757043	387.432	NaN	NaN
		0.641983	0.209727	0.799613	1.49926	0.796528	2.85666	2.22227	0.389466	3.44794	37.0571	15.6842	1767.12	170.388	77.685	366.021	299.9	163.701	432.507	37.724	16.7695	399552	510.764	96.6829	854318	304.01	NaN	NaN
		0.641983	0.209727	0.799613	1.49926	0.796528	2.85666	2.22227	0.389466	3.44794	37.0571	15.6842	1767.12	170.388	77.685	366.021	299.9	163.701	432.507	37.724	16.7695	399552	510.764	96.6829	854318	304.01	NaN	NaN
		0.641983	0.209727	0.799613	1.49926	0.796528	2.85666	2.22227	0.389466	3.44794	37.0571	15.6842	1767.12	170.388	77.685	366.021	299.9	163.701	432.507	37.724	16.7695	399552	510.764	96.6829	854318	304.01	NaN	NaN
		1.28397	0.419454	1.59923	2.99853	1.59306	5.71332	4.44454	0.778933	6.89588	74.1142	31.3685	3534.25	340.776	155.37	732.041	599.8	327.403	865.014	75.4481	33.5389	799103	1021.53	193.366	1.70864e+06	608.02	NaN	NaN
		0.641983	0.209727	0.799613	1.49926	0.796528	2.85666	2.22227	0.389466	3.44794	37.0571	15.6842	1767.12	170.388	77.685	366.021	299.9	163.701	432.507	37.724	16.7695	399552	510.764	96.6829	854318	304.01	NaN	NaN
		0.641983	0.209727	0.799613	1.49926	0.796528	2.85666	2.22227	0.389466	3.44794	37.0571	15.6842	1767.12	170.388	77.685	366.021	299.9	163.701	432.507	37.724	16.7695	399552	510.764	96.6829	854318	304.01	NaN	NaN
		1.92595	0.629181	2.39884	4.49779	2.38959	8.56998	6.66682	1.1684	10.3438	111.171	47.0527	5301.37	511.165	233.055	1098.06	899.7	491.104	1297.52	113.172	50.3084	1.19865e+06	1532.29	290.049	2.56295e+06	912.029	NaN	NaN
Photorespiration
		1.52273e-08	4.46105e-16	0.617188	2.25932e-15	2.27427e-16	2.37904e-08	2.38546e-16	1.0423e-16	5.27318e-09	8.75103e-06	-4.26326e-14	22.9704	7.5902	-7.68807e-12	282.045	0.000838519	-4.26326e-14	53594.5	4.03888e-06	-3.55271e-14	1113.53	2.45827e-06	5.12543e-10	1.4656e+06	0.00127599	NaN	NaN
		7.61231e-09	2.43387e-16	0.308594	1.12966e-15	1.74215e-16	1.18952e-08	1.19287e-16	6.03061e-17	2.63659e-09	4.37551e-06	-4.61853e-14	11.4852	3.7951	-3.86891e-12	141.023	0.00041926	-4.61853e-14	26797.3	2.01944e-06	-4.26326e-14	556.764	1.22914e-06	2.56247e-10	732798	0.000637993	NaN	NaN
		7.60764e-09	2.09285e-16	0.308594	1.12966e-15	1.08757e-16	1.18952e-08	1.19266e-16	2.23882e-17	2.63659e-09	4.37551e-06	-1.06581e-14	11.4852	3.7951	-3.83338e-12	141.023	0.00041926	-1.06581e-14	26797.3	2.01944e-06	-7.10543e-15	556.764	1.22914e-06	2.56282e-10	732798	0.000637993	NaN	NaN
		-1.86265e-09	-3.60887e-09	0.308594	6.98492e-10	-9.60426e-09	4.91855e-08	0	-1.22236e-08	1.26893e-08	4.37551e-06	0	11.4852	3.7951	0	141.023	0.00041926	0	26797.3	2.01944e-06	0	556.764	1.22888e-06	0	732798	0.000637993	NaN	NaN
Starch synthesis
		0.320991	0.0372165	0.372257	0.749632	0.288945	1.30255	-3.05231e-15	-3.72078e-11	0.31727	18.5257	7.84099	29.9005	49.3233	14.9851	85.3777	81.6865	21.2342	132.51	18.8415	7.41443	30.1329	50.45	19.3459	83.6047	83.4226	NaN	NaN
		0.320991	0.0372165	0.372257	0.749632	0.288945	1.30255	-3.74278e-12	-1.7949e-09	0.31727	18.5257	7.84099	29.9005	49.3233	14.9851	85.3777	81.6865	21.2342	132.51	18.8415	7.41443	30.1329	50.45	19.3459	83.6047	83.4226	NaN	NaN
		0.320991	0.0372165	0.372257	0.749632	0.288945	1.30255	6.03985e-16	2.29171e-16	0.31727	18.5257	7.84099	29.9005	49.3233	14.9851	85.3777	81.6865	21.2342	132.51	18.8415	7.41443	30.1329	50.45	19.3459	83.6047	83.4226	NaN	NaN
		0.320991	0.0372165	0.372257	0.749632	0.288945	1.30255	5.98249e-16	1.50974e-16	0.31727	18.5257	7.84099	29.9005	49.3233	14.9851	85.3777	81.6865	21.2342	132.51	18.8415	7.41443	30.1329	50.45	19.3459	83.6047	83.4226	NaN	NaN
Sucrose synthesis
		-9.9587e-14	-1.40018e-10	8.88313e-11	1.74527e-12	-1.03948e-11	0.252685	1.11114	0.099511	1.71261	2.00651e-07	2.00644e-07	3.19734e-07	33.9728	10.6951	57.7879	68.2592	26.4728	116.999	2e-07	NaN	3.17608e-07	33.967	13.8396	54.2113	68.582	NaN	NaN
		8.21989e-16	9.20467e-23	1.24876e-15	3.56778e-14	4.90949e-17	0.252685	1.11114	0.099511	1.71261	2.00651e-07	2.00644e-07	3.19734e-07	33.9728	10.6951	57.7879	68.2592	26.4728	116.999	2e-07	NaN	3.17608e-07	33.967	13.8396	54.2113	68.582	NaN	NaN
		1.24963e-16	-3.076e-11	1.01977e-10	2.2098e-14	-9.46069e-14	0.126342	0.555568	0.0497555	0.856305	1.00325e-07	1.00322e-07	1.59867e-07	16.9864	5.34755	28.894	34.1296	13.2364	58.4994	1e-07	NaN	1.58804e-07	16.9835	6.91979	27.1056	34.291	NaN	NaN
		-2.80972e-14	-6.14983e-12	3.42978e-12	-4.61853e-14	-3.26106e-12	0.126342	0.555568	0.0497555	0.856305	1.00325e-07	1.00322e-07	1.59867e-07	16.9864	5.34755	28.894	34.1296	13.2364	58.4994	1e-07	NaN	1.58804e-07	16.9835	6.91979	27.1056	34.291	NaN	NaN
		7.42046e-16	5.29929e-23	9.31663e-16	1.35798e-14	1.99983e-17	0.126342	0.555568	0.0497555	0.856305	1.00325e-07	1.00322e-07	1.59867e-07	16.9864	5.34755	28.894	34.1296	13.2364	58.4994	1e-07	NaN	1.58804e-07	16.9835	6.91979	27.1056	34.291	NaN	NaN
		6.96773e-16	5.08233e-23	8.04938e-16	1.35798e-14	1.49677e-17	0.126342	0.555568	0.0497555	0.856305	1.00325e-07	1.00322e-07	1.59867e-07	16.9864	5.34755	28.894	34.1296	13.2364	58.4994	1e-07	NaN	1.58804e-07	16.9835	6.91979	27.1056	34.291	NaN	NaN
Branch towards TCA cycle
		2.29856e-09	1.47835e-17	0.109077	1.0679e-11	1.68942e-18	1.5855e-08	1.81135e-17	5.9846e-19	1.63459e-09	0.00569957	6.21725e-15	532.877	0.00104164	7.99361e-15	278076	0.00808726	-5.32907e-15	412451	0.0409607	1.77636e-15	NaN	341.93	0	610935	3.36712e-06	NaN	NaN
		6.53284e-12	4.15317e-18	0.105402	8.08688e-13	3.07358e-19	8.81155e-09	9.43517e-19	2.2155e-18	3.0554e-09	0.00569947	0	436.421	0.00104154	0	114905	1e-07	0	83902.6	0.0409606	0	NaN	2.94277	0	NaN	1.68523e-06	NaN	NaN
Transport plastid - cytosol
		3.7835e-08	-1.10595e-08	0.109077	-6.98492e-10	-1.31549e-08	4.44707e-08	0	-1.05938e-08	1.49594e-08	0.00569957	0	532.877	0.00104164	0	278076	0.00808726	0	412451	0.0409607	0	NaN	341.93	0	610935	3.36712e-06	NaN	NaN
		1.88709e-07	-7.06059e-08	3.14962e-07	-2.09548e-09	-6.28061e-08	0.505369	2.22227	0.199022	3.42522	4.01302e-07	4.01289e-07	6.39468e-07	67.9456	21.3902	115.576	136.518	52.9456	233.998	4e-07	NaN	6.35216e-07	67.934	27.6792	108.423	137.164	NaN	NaN
		0	-0.00418479	0.00277513	2.06055e-08	-2.05589e-07	1.61584e-07	5.00586e-09	-9.40636e-08	9.5577e-08	-9.99999e-08	-929.079	-1.46549e-14	-9.99998e-08	-262.389	-1.46549e-14	-0.00808716	-188039	-1.46549e-14	-1e-07	-294746	-1.46549e-14	-338.987	-691348	-5.68434e-14	-1.6819e-06	NaN	NaN
Branch towards fatty acid synthesis / shikimate pathway
		2.3505e-09	1.68323e-17	0.105026	1.0682e-11	1.69532e-18	1.91146e-08	1.84588e-17	6.08491e-19	1.61305e-09	9.99999e-08	0	929.079	9.99998e-08	0	262.389	0.00808716	0	188039	1e-07	0	294746	338.987	0	691348	1.6819e-06	NaN	NaN
		6.56259e-12	4.17607e-18	0.102432	8.0868e-13	3.87239e-19	8.82565e-09	9.06819e-19	2.57421e-18	3.0227e-09	9.99999e-08	0	929.079	9.99998e-08	0	262.389	0.00808716	0	188039	1e-07	0	294746	338.987	0	691348	1.6819e-06	NaN	NaN
		acceptable	100% acceptable		acceptable	100% acceptable		acceptable	81.6% acceptable
