# Supplementary material for: A simulation-free constrained regression approach for flux estimation in isotopically nonstationary metabolic flux analysis with applications in microalgae
Source: Front Plant Sci. 2023 Nov 23;14:1140829. doi: 10.3389/fpls.2023.1140829 (PMC10702240; doi:10.3389/fpls.2023.1140829)
Supplement: Supplementary file 6 [file Table_5.xlsx]

## Sheet: S5
Pool size estimated by INCA and total pool size measured by Treves et al.
Table S5. Metabolite turnover calculated from measured pool size and estimated flux values (regression with fixed pool sizes, see Supplementary Table S4) for metabolites RuBP, FBP and SBP.
Measured pool size for metabolites RuBP, FBP and SBP
	Treves et al.			INCA
	C. reinhardtii	C. sorokiniana	C. ohadii	C. reinhardtii	C. sorokiniana	C. ohadii
RuBP	127.57	1588.59	267.995	123.14	1394.3	6	0.0005	0.00067	0.0235
FBP	20.7679	69.8119	42.2656	0.003	0.0026	70.62	725.3	2e-07	0.002
SBP	31.56	36.0769	39.5279	33.42	36.67	42.22
Metabolite turnover (sec) obtained from flux estimates and measured pool size.
	regression approach			INCA
	C. reinhardtii	C. sorokiniana	C. ohadii	C. reinhardtii	C. sorokiniana	C. ohadii
RuBP	66.2376	353.193	40.1984	1.14751	3.10778	0.297872
FBP	21.5664	31.0427	15.2153	0.882796	0.317743	0.110763
SBP	49.1602	24.0631	17.7871	0.85166	0.211734	0.131804
