# Supplementary material for: A simulation-free constrained regression approach for flux estimation in isotopically nonstationary metabolic flux analysis with applications in microalgae
Source: Front Plant Sci. 2023 Nov 23;14:1140829. doi: 10.3389/fpls.2023.1140829 (PMC10702240; doi:10.3389/fpls.2023.1140829)
Supplement: Supplementary file 7 [file Table_6.xlsx]

## Sheet: S6
Table S6. Compartmentation coefficients used in regression approach (fixed pool sizes) and compartmentation coefficients obtained from INCA (all MIDs).
	C. reinhardtii		C. sorokiniana		C. ohadii
metabolites	constrained regression	INCA (from compartmentation pseudo-reaction)	constrained regression	INCA (from compartmentation pseudo-reaction)	constrained regression	INCA (from compartmentation pseudo-reaction)
T3P	0.660124	0.383126	0.852025	0	0.726298	2.42466
F6P	0.266704	0.356852	0.247199	0.00300903	0.65503	0.647446
FBP	0.882883	0.175088	0.29451	0	0.107842	9999
G1P	0.643703	0	0.195144	0	0.774571	0.00200401
G6P	0.309619	0.001001	0.627367	0	0.837866	1.68097
