# Supplementary material for: A simulation-free constrained regression approach for flux estimation in isotopically nonstationary metabolic flux analysis with applications in microalgae
Source: Front Plant Sci. 2023 Nov 23;14:1140829. doi: 10.3389/fpls.2023.1140829 (PMC10702240; doi:10.3389/fpls.2023.1140829)
Supplement: Supplementary file 8 [file Table_7.xlsx]

## Sheet: S7
Table S7. Comparison of mean measured pool sizes and estimates from INCA.
	C. reinhardtii		C. sorokiniana		C. ohadii
metabolite	INCA	measured	INCA	measured	INCA	measured
ADPG	4.71446	4.68	16.9063	16.72	8.28162	8.31
F6P.c	301.822		1847.5		38412.2
F6P.p	201.261		969.852		734.35
F6P total	503.083	18.74	2817.35	94.33	39146.6	58.67
FBP.c	1.92765		0.001		22.0527
FBP.p	0.00120109		0.0075		0.00111715
FBP total	1.92885	20.77	0.0085	69.81	22.0538	42.27
G1P.c	0.0226456		0.95774		0.0529683
G1P.p	488.912		800.473		1065.11
G1P total	488.935	15.51	801.43	75.31	1065.16	42.56
G6P.c	0.211047		72.1144		223177
G6P.p	0.00889666		0.00016733		0.00153592
G6P total	0.219944	65.75	72.1146	304.17	223177	145.29
RUBP	123.524	127.57	1372	1588.6	271.267	268
UDPG	24.08	28.08	68.8404	68.89	105.27	105.27
T3P.c	4.52682e-06		0.0001216		461.85
T3P.p	503.695		0.00013186		2800.95
T3P (DHAP) total	503.695		0.00025346		3262.8
