# Supplementary material for: A simulation-free constrained regression approach for flux estimation in isotopically nonstationary metabolic flux analysis with applications in microalgae
Source: Front Plant Sci. 2023 Nov 23;14:1140829. doi: 10.3389/fpls.2023.1140829 (PMC10702240; doi:10.3389/fpls.2023.1140829)
Supplement: Supplementary file 9 [file Table_8.xlsx]

## Sheet: S8
Table S8. Net flux estimates obtained from different version of the constrained regression with respect to integrated data for three algae under LL condition.
Flux is estimated using the compartmented CBC model (see also Supplementary File S2) and given in units nmol gDW-1 s-1.
		1	2	3	4	5	6	7	8	9	10	11	12	13	14	15	16	17	18	19	20	21	22	23	24	25	26	27	28	29	30	31	32	33	34	35	36	37	38	39	40	41	42	43	44	45
		regression approach (pool size fixed, compartmentation sampled)									regression approach (pool size from INCA, compartmentation sampled)									regression approach (pool size as predicted variable, compartmentation from INCA)									regression approach (rescaled MID)									regression approach (v_exch_measured/100)
Reaction abbreviation	Reaction equation	C. reinhardtii	95% CI		C. sorokiniana	95% CI		C. ohadii	95% CI		C. reinhardtii	95% CI		C. sorokiniana	95% CI		C. ohadii	95% CI		C. reinhardtii	95% CI		C. sorokiniana	95% CI		C. ohadii	95% CI		C. reinhardtii	95% CI		C. sorokiniana	95% CI		C. ohadii	95% CI		C. reinhardtii	95% CI		C. sorokiniana	95% CI		C. ohadii	95% CI
Calvin-Benson-Basham cycle			LB	UB		LB	UB		LB	UB		LB	UB		LB	UB		LB	UB		LB	UB		LB	UB		LB	UB		LB	UB		LB	UB		LB	UB		LB	UB		LB	UB		LB	UB
		1.92595	0.552505	2.23354	4.49779	2.38959	8.56998	6.66682	1.1684	10.3438	1	1	1	1	1	1	6.22201	3.26916	11.0724	0.602357	0.63358	0.651601	9.81609	13.525	14.4174	4.57528	0.490196	0.530702	2.31651	1	1.12827	4.71497	3.81758	5.32094	1	1	1.78706	1.4439	1.06287	1.77665	5.14701	5.04633	5.32508	6.98716	3.36216	8.57366
		1.92595	0.60411	2.23354	4.49779	2.38959	8.56998	6.66682	1.1684	10.3438	1	1	1	1.0002	0.779378	1.25988	6.22201	3.26916	11.0724	0.602357	0.63358	0.651601	9.81609	13.525	14.4174	4.57528	0.490196	0.530702	2.33067	1	1.18008	4.71497	3.81758	5.32094	0.999998	0.999958	1.78706	1.54489	1.06287	1.97148	5.14701	5.04633	5.32508	6.98716	3.36216	8.57366
		1.52307e-08	2.27409e-16	0.617188	2.25932e-15	1.24865e-17	2.37904e-08	2.38661e-16	1.33786e-16	5.27318e-09	2.02247e-14	6.64615e-19	3.73969e-11	3.64754e-16	1.06461e-190	1.09892e-14	2.01201e-14	1.01863e-16	1.07644e-08	7.78357e-20	1.69428e-36	8.48514e-10	1.29036e-10	9.7289e-14	1.90998e-09	3.26969e-10	1.59235e-13	2.65236e-09	0.0283129	1.72313e-17	0.119518	5.88703e-11	2.48276e-17	1.7502e-08	1.28796e-08	3.5594e-42	5.6264e-08	0.201991	7.3684e-16	0.401522	6.13817e-12	1.33999e-18	3.04077e-09	4.98411e-11	1.69019e-19	5.49699e-10
		3.8519	1.25836	4.6512	8.99559	4.77917	17.14	13.3336	2.3368	20.6876	1.66667	1.66667	1.66667	1.02738	4.31337e-56	2.04674	12.444	6.53832	22.1448	1.20471	1.26716	1.3032	19.6322	27.0501	28.8348	9.15057	0.980393	1.0614	4.69175	1.7223	2.38855	9.42994	7.63516	10.6419	1.66647	1.66208	3.57412	3.29999	2.12574	4.34621	10.294	10.0927	10.6502	13.9743	6.72431	17.1473
		0.962974	0.310674	1.11677	2.2489	1.19479	4.16999	2.22227	0.402887	3.48017	0.333333	0.333333	0.333333	0.113003	0.00671334	0.475909	2.074	1.11134	3.70754	0.301179	0.31679	0.325801	3.27203	4.50835	4.80581	1.52509	0.245098	0.265351	1.16639	0.36115	0.55819	2.35748	1.90879	2.66047	0.333213	0.332582	0.893526	0.776554	0.531435	0.986604	2.23109	2.18482	2.31748	2.86295	1.13814	3.57362
		0.962974	0.310674	1.11677	2.2489	1.19479	4.16999	2.22227	0.402887	3.48017	0.333333	0.333333	0.333333	0.113053	0.00752802	0.422441	2.074	1.11134	3.70754	0.301179	0.31679	0.325801	3.27203	4.50835	4.80581	1.52509	0.245098	0.265351	1.16639	0.36115	0.55819	2.35748	1.90879	2.66047	0.333174	0.332734	0.893518	0.776554	0.531435	0.986604	2.23109	2.18482	2.31748	2.86295	1.13814	3.57362
		0.641983	0.209727	0.799613	1.49926	0.796528	2.85666	2.22227	0.389466	3.44794	0.333333	0.333333	0.333333	0.135059	-0.0511891	0.452356	2.074	1.08972	3.6908	0.200786	0.211193	0.2172	3.27203	4.50835	4.80581	1.52509	0.163399	0.176901	0.786326	0.333333	0.432727	1.57166	1.27253	1.77365	0.333403	0.332958	0.603086	0.582294	0.35429	0.790376	1.71567	1.68211	1.77503	2.32905	1.12072	2.85789
		0.641983	0.209727	0.799613	1.49926	0.796528	2.85666	2.22227	0.389466	3.44794	0.333333	0.333333	0.333333	0.135061	2.50151e-42	0.461238	2.074	1.08972	3.6908	0.200786	0.211193	0.2172	3.27203	4.50835	4.80581	1.52509	0.163399	0.176901	0.786326	0.333333	0.432727	1.57166	1.27253	1.77365	0.33343	0.333038	0.603098	0.582294	0.35429	0.790376	1.71567	1.68211	1.77503	2.32905	1.12072	2.85789
		0.641983	0.209727	0.799613	1.49926	0.796528	2.85666	2.22227	0.389466	3.44794	0.333333	0.333333	0.333333	0.135061	2.05624e-47	0.467038	2.074	1.08972	3.6908	0.200786	0.211193	0.2172	3.27203	4.50835	4.80581	1.52509	0.163399	0.176901	0.786326	0.333333	0.432727	1.57166	1.27253	1.77365	0.333447	0.333034	0.603095	0.582294	0.35429	0.790376	1.71567	1.68211	1.77503	2.32905	1.12072	2.85789
		1.28397	0.419454	1.59923	2.99853	1.59306	5.71332	4.44454	0.778933	6.89588	0.666667	0.666667	0.666667	0.57886	-0.386782	1.30713	4.14801	2.17944	7.38159	0.401571	0.422386	0.434401	6.54406	9.01669	9.61161	3.05019	0.326798	0.353802	1.57265	0.666667	0.865453	3.14331	2.54505	3.5473	0.66661	0.666244	1.20619	1.16459	0.70858	1.58075	3.43134	3.36422	3.55006	4.6581	2.24144	5.71577
		0.641983	0.209727	0.799613	1.49926	0.796528	2.85666	2.22227	0.389466	3.44794	0.333333	0.333333	0.333333	0.328656	-0.211358	0.606656	2.074	1.08972	3.6908	0.200786	0.211193	0.2172	3.27203	4.50835	4.80581	1.52509	0.163399	0.176901	0.786326	0.333333	0.432727	1.57166	1.27253	1.77365	0.333412	0.333015	0.603092	0.582294	0.35429	0.790376	1.71567	1.68211	1.77503	2.32905	1.12072	2.85789
		0.641983	0.209727	0.799613	1.49926	0.796528	2.85666	2.22227	0.389466	3.44794	0.333333	0.333333	0.333333	0.168472	-0.213719	0.55298	2.074	1.08972	3.6908	0.200786	0.211193	0.2172	3.27203	4.50835	4.80581	1.52509	0.163399	0.176901	0.786326	0.333333	0.432727	1.57166	1.27253	1.77365	0.33341	0.333052	0.603093	0.582294	0.35429	0.790376	1.71567	1.68211	1.77503	2.32905	1.12072	2.85789
		1.92595	0.629181	2.39884	4.49779	2.38959	8.56998	6.66682	1.1684	10.3438	1	1	1	0.99994	0.827842	1.19517	6.22201	3.26916	11.0724	0.602357	0.63358	0.651601	9.81609	13.525	14.4174	4.57528	0.490196	0.530702	2.35898	1	1.29818	4.71497	3.81758	5.32094	1.00001	0.999957	1.80928	1.74688	1.06287	2.37113	5.14701	5.04633	5.32508	6.98716	3.36216	8.57366
Photorespiration
		1.52273e-08	4.46105e-16	0.617188	2.25932e-15	2.27427e-16	2.37904e-08	2.38546e-16	1.0423e-16	5.27318e-09	2.03109e-14	6.68945e-19	3.9119e-11	1.41706e-15	8.91336e-216	1.25335e-14	2.08968e-14	1.59495e-16	1.07644e-08	7.7878e-20	1.69462e-36	8.47601e-10	1.2902e-10	9.72887e-14	1.90998e-09	3.26911e-10	1.31679e-13	2.65193e-09	0.0283129	5.06532e-18	0.119518	5.87746e-11	6.11178e-16	1.7502e-08	1.13082e-08	3.88495e-37	5.05633e-08	0.201991	1.57553e-15	0.401522	6.13817e-12	8.66847e-18	3.04077e-09	4.98414e-11	1.09052e-19	5.49701e-10
		7.61231e-09	2.43387e-16	0.308594	1.12966e-15	1.74215e-16	1.18952e-08	1.19287e-16	6.03061e-17	2.63659e-09	1.25169e-14	3.88312e-19	2.26593e-11	7.00843e-16	1.55064e-170	3.61496e-13	1.06477e-14	8.02614e-17	5.38221e-09	3.89524e-20	8.47462e-37	4.2288e-10	6.44919e-11	4.86444e-14	9.54987e-10	1.63385e-10	5.90234e-14	1.32575e-09	0.0141565	5.38829e-18	0.0597591	2.91898e-11	4.11547e-16	8.75099e-09	4.84733e-09	3.95591e-36	2.35118e-08	0.100995	7.85609e-16	0.200761	3.07107e-12	4.22394e-18	1.52039e-09	2.49207e-11	1.48274e-19	2.74851e-10
		7.60764e-09	2.09285e-16	0.308594	1.12966e-15	1.08757e-16	1.18952e-08	1.19266e-16	2.23882e-17	2.63659e-09	1.25762e-14	3.97994e-19	2.32274e-11	6.15149e-16	5.39382e-189	2.77602e-14	1.1201e-14	7.9923e-17	5.38221e-09	3.8991e-20	8.47901e-37	4.22512e-10	6.44685e-11	4.86443e-14	9.54938e-10	1.63307e-10	4.74124e-14	1.32498e-09	0.0141565	2.7894e-18	0.0597591	2.90381e-11	7.43011e-16	8.75099e-09	4.50751e-24	5.52275e-76	6.88043e-09	0.100995	7.57319e-16	0.200761	3.07654e-12	4.13784e-18	1.52039e-09	2.49208e-11	1.32536e-19	2.74854e-10
		-1.86265e-09	-3.60887e-09	0.308594	6.98492e-10	-9.60426e-09	4.91855e-08	0	-1.22236e-08	1.26893e-08	-5.82077e-11	-3.49246e-10	2.32831e-10	-6.5309e-08	-0.152819	0.155669	-5.82077e-11	-6.69388e-10	5.47152e-09	0	0	5.23869e-10	1.16415e-10	-5.82077e-11	2.99769e-09	1.16415e-10	-9.92441e-09	1.09721e-08	0.0141565	-4.83124e-08	0.0597591	-3.49246e-10	-1.32713e-08	1.92085e-08	-5.2515e-07	-1.11969e-05	1.22777e-05	0.100995	-1.35915e-08	0.200761	0	-5.93718e-09	1.30676e-08	0	-4.33647e-09	2.88128e-09
Starch synthesis
		0.320991	0.0372165	0.372257	0.749632	0.288945	1.30255	-3.05231e-15	-3.72078e-11	0.31727	-9.20889e-12	-6.61645e-10	3.1603e-10	-0.0196967	-0.3296	0.235178	6.89793e-11	-4.47277e-10	0.371532	0.100393	0.105597	0.1086	3.68217e-11	5.70655e-14	1.96718e-09	6.37542e-11	0.0816995	0.0884504	0.380059	0.0268345	0.172799	0.785828	0.636264	0.886824	-0.000115142	-0.000464862	0.294486	0.19426	0.176403	0.200769	0.515425	0.499556	0.541356	0.533893	8.75916e-10	0.717747
		0.320991	0.0372165	0.372257	0.749632	0.288945	1.30255	-3.74278e-12	-1.7949e-09	0.31727	-3.07979e-12	-3.2275e-10	3.50226e-11	-1.83353e-05	-0.0784911	0.103825	-3.85967e-11	-4.7433e-10	0.371532	0.100393	0.105597	0.1086	3.54371e-11	1.25798e-13	1.96727e-09	6.37812e-11	0.0816995	0.0884504	0.380059	0.0268345	0.172799	0.785828	0.636264	0.886824	3.99139e-05	-0.000163894	0.294485	0.19426	0.176403	0.200769	0.515425	0.499556	0.541356	0.533893	8.75884e-10	0.717747
		0.320991	0.0372165	0.372257	0.749632	0.288945	1.30255	6.03985e-16	2.29171e-16	0.31727	5.45529e-15	1.51813e-19	9.70991e-12	1.91114e-16	1.18019e-210	1.53175e-15	1.13408e-13	1.67895e-16	0.371532	0.100393	0.105597	0.1086	3.54371e-11	1.25798e-13	1.96727e-09	6.36146e-11	0.0816995	0.0884504	0.380059	0.0268345	0.172799	0.785828	0.636264	0.886824	9.523e-55	8.61427e-58	0.294479	0.19426	0.176403	0.200769	0.515425	0.499556	0.541356	0.533893	8.75895e-10	0.717747
		0.320991	0.0372165	0.372257	0.749632	0.288945	1.30255	5.98249e-16	1.50974e-16	0.31727	5.57995e-15	1.62938e-19	9.80127e-12	2.12122e-16	2.29471e-228	2.42672e-15	1.22932e-13	1.43996e-16	0.371532	0.100393	0.105597	0.1086	3.54869e-11	2.29021e-13	1.96727e-09	6.30451e-11	0.0816995	0.0884504	0.380059	0.0268345	0.172799	0.785828	0.636264	0.886824	6.93712e-95	1.50986e-93	0.294493	0.19426	0.176403	0.200769	0.515425	0.499556	0.541356	0.533893	8.75888e-10	0.717747
Sucrose synthesis
		-9.9587e-14	-1.40018e-10	8.88313e-11	1.74527e-12	-1.03948e-11	0.252685	1.11114	0.099511	1.71261	-2.9976e-15	-1.64799e-13	1.98139e-11	-3.90268e-16	-1.65626e-14	6.13549e-17	1.037	0.344683	1.83006	-1.24082e-22	-1.03789e-14	1.35151e-16	1.63602	2.25417	2.4029	0.762547	-7.71065e-08	-2.68027e-09	2.86837e-13	-1.22335e-09	1.04238e-09	-4.5402e-09	-2.03145e-08	3.88827e-08	-1.39699e-16	-0.00191052	0.000207736	-1.17123e-11	-1.36196e-10	1.64143e-10	0.34241	0.336913	0.352458	0.630632	0.424423	0.726484
		8.21989e-16	9.20467e-23	1.24876e-15	3.56778e-14	4.90949e-17	0.252685	1.11114	0.099511	1.71261	4.2727e-18	1.81331e-22	9.90863e-15	1.29327e-15	3.59049e-154	2.25694e-11	1.037	0.344683	1.83006	8.91557e-17	4.52069e-36	3.12132e-16	1.63602	2.25417	2.4029	0.762547	5.88714e-18	1.29548e-13	1.33788e-22	4.16374e-24	5.46549e-17	1.34374e-11	2.74993e-18	2.31522e-09	8.08275e-05	3.47925e-21	0.00021832	8.74027e-19	6.52083e-25	4.3553e-17	0.34241	0.336913	0.352458	0.630632	0.424423	0.726484
		1.24963e-16	-3.076e-11	1.01977e-10	2.2098e-14	-9.46069e-14	0.126342	0.555568	0.0497555	0.856305	-1.01389e-12	-1.1852e-10	4.30991e-11	1.46667e-05	-0.0977482	0.120064	0.518501	0.172342	0.915032	-1.42277e-05	-0.000816191	3.79502e-16	0.818008	1.12709	1.20145	0.381274	-7.40319e-14	5.95071e-14	-4.88107e-16	-3.34111e-11	2.63798e-11	-2.17604e-12	-4.23988e-08	3.78484e-08	3.43551e-05	-1.41857e-05	0.000164593	-4.64517e-13	-5.87246e-10	2.71122e-10	0.171205	0.168457	0.176229	0.315316	0.212212	0.363242
		-2.80972e-14	-6.14983e-12	3.42978e-12	-4.61853e-14	-3.26106e-12	0.126342	0.555568	0.0497555	0.856305	5.97105e-13	-1.44689e-10	5.93153e-11	6.66456e-06	-0.0325548	0.0394992	0.518501	0.172342	0.915032	-7.11382e-06	-0.000369963	6.45595e-16	0.818008	1.12709	1.20145	0.381274	-7.78215e-14	4.10138e-14	-2.515e-16	-7.00002e-13	8.17241e-13	3.49246e-10	-5.23869e-10	4.19095e-09	5.37302e-05	-4.80297e-13	8.52087e-05	-1.77178e-12	-1.80671e-11	2.13476e-11	0.171205	0.168457	0.176229	0.315316	0.212212	0.363242
		7.42046e-16	5.29929e-23	9.31663e-16	1.35798e-14	1.99983e-17	0.126342	0.555568	0.0497555	0.856305	1.62478e-18	8.05961e-23	5.16346e-15	9.33629e-16	2.34522e-215	6.2612e-14	0.518501	0.172342	0.915032	5.67258e-27	4.03018e-34	2.34855e-17	0.818008	1.12709	1.20145	0.381274	6.25299e-18	1.55186e-13	6.31481e-23	2.36122e-24	2.31183e-17	9.39929e-12	2.67744e-18	3.0786e-10	3.20128e-95	1.2355e-58	4.95446e-05	4.66785e-19	2.54475e-25	1.26154e-17	0.171205	0.168457	0.176229	0.315316	0.212212	0.363242
		6.96773e-16	5.08233e-23	8.04938e-16	1.35798e-14	1.49677e-17	0.126342	0.555568	0.0497555	0.856305	1.30902e-18	1.08699e-22	4.08879e-15	9.33502e-16	6.5262e-216	7.87162e-14	0.518501	0.172342	0.915032	2.13414e-05	1.31161e-19	0.00115062	0.818008	1.12709	1.20145	0.381274	6.25198e-18	1.55174e-13	4.13208e-23	1.64401e-24	1.5269e-17	9.39931e-12	2.67753e-18	3.0786e-10	5.23195e-95	1.82181e-65	5.09984e-05	3.28214e-19	1.87713e-25	1.00529e-17	0.171205	0.168457	0.176229	0.315316	0.212212	0.363242
Branch towards TCA cycle
		2.29856e-09	1.47835e-17	0.109077	1.0679e-11	1.68942e-18	1.5855e-08	1.81135e-17	5.9846e-19	1.63459e-09	0.167244	0.163241	0.183243	0.441617	1.37663e-86	1.13668	1.32965e-13	6.03394e-18	6.11856e-09	8.65224e-22	1.45518e-37	8.94681e-10	1.06259e-08	6.27685e-16	1.23799e-09	1.60075e-08	1.54299e-15	1.01599e-09	0.0065587	8.27884e-14	0.157716	2.28746e-12	4.70471e-19	1.02919e-08	0.174981	4.81085e-25	0.230374	0.0505323	1.92762e-17	0.110692	2.10736e-13	5.39453e-20	3.35247e-09	2.96629e-13	4.57644e-21	8.29774e-10
		6.53284e-12	4.15317e-18	0.105402	8.08688e-13	3.07358e-19	8.81155e-09	9.43517e-19	2.2155e-18	3.0554e-09	0.16725	0.165418	0.169611	0.569846	5.19914e-128	1.04949	5.30502e-15	2.65292e-18	5.80537e-09	2.96192e-19	7.1839e-38	7.89117e-10	1.91196e-11	6.23172e-16	1.59406e-09	1.51112e-08	8.3515e-17	1.63785e-09	0.00621193	2.86561e-13	0.14912	9.0973e-10	2.10336e-19	6.09542e-09	0.168277	1.73475e-30	0.194481	0.0477796	6.23966e-18	0.104108	5.01424e-15	2.23834e-20	1.12636e-09	2.15779e-12	8.27819e-21	2.68407e-09
Transport plastid - cytosol
		3.7835e-08	-1.10595e-08	0.109077	-6.98492e-10	-1.31549e-08	4.44707e-08	0	-1.05938e-08	1.49594e-08	0.167244	0.163241	0.183243	0.441617	-0.127663	1.15974	-5.82077e-11	-9.60426e-10	6.98492e-09	0	-5.82077e-11	9.31323e-10	1.05938e-08	0	1.45519e-09	1.60653e-08	-1.03319e-08	1.17579e-08	0.0065587	-1.74623e-09	0.157716	-4.65661e-10	-1.33878e-08	2.87546e-08	0.174981	-1.2751e-06	0.230377	0.0505323	-1.62399e-08	0.110692	0	-8.84756e-09	9.80799e-09	-5.82077e-11	-2.93949e-09	4.13274e-09
		1.88709e-07	-7.06059e-08	3.14962e-07	-2.09548e-09	-6.28061e-08	0.505369	2.22227	0.199022	3.42522	-1.16415e-10	-1.74041e-08	2.88128e-08	0.0552766	-0.276073	0.226835	2.074	0.689367	3.66013	0	-1.16415e-10	1.16415e-10	3.27203	4.50835	4.80581	1.52509	-1.61177e-07	-5.06407e-09	-5.82077e-10	-1.00292e-07	4.28583e-07	4.77303e-09	-7.89878e-08	1.09838e-07	1.5113e-06	-0.0037451	0.000406759	1.156e-07	-1.51049e-07	6.90517e-07	0.68482	0.673827	0.704916	1.26126	0.848847	1.45297
		0	-0.00418479	0.00277513	2.06055e-08	-2.05589e-07	1.61584e-07	5.00586e-09	-9.40636e-08	9.5577e-08	5.66302e-06	-0.0153616	0.00350903	0.128229	-0.504214	0.450621	0	-1.00903e-07	1.35071e-07	0	-7.39819e-08	5.52391e-08	-5.12227e-09	-2.97441e-08	2.04891e-08	2.32831e-10	-2.72994e-08	2.37487e-08	-0.000346766	-0.0106628	1.20199e-08	-1.19908e-07	-2.03785e-07	2.05298e-07	-0.00670379	-0.0479553	0.0382502	-0.0027527	-0.0067794	9.65083e-08	1.95578e-08	-1.93832e-08	4.69736e-08	3.49246e-10	-1.75904e-07	1.80211e-07
Branch towards fatty acid synthesis / shikimate pathway
		2.3505e-09	1.68323e-17	0.105026	1.0682e-11	1.69532e-18	1.91146e-08	1.84588e-17	6.08491e-19	1.61305e-09	0.166089	0.15009	0.170092	0.530941	1.37665e-86	1.20257	1.34019e-13	5.80523e-18	7.12582e-09	8.65224e-22	1.46911e-37	9.29028e-10	2.97181e-10	5.89962e-16	1.23799e-09	1.60132e-08	1.31831e-15	9.8727e-10	0.00549305	4.26562e-14	0.130826	2.3716e-12	4.99272e-19	1.05286e-08	0.158572	3.05656e-28	0.216368	0.0422456	1.70528e-17	0.0913743	2.08131e-13	5.24971e-20	3.22333e-09	3.0279e-13	3.96299e-21	7.54747e-10
		6.56259e-12	4.17607e-18	0.102432	8.0868e-13	3.87239e-19	8.82565e-09	9.06819e-19	2.57421e-18	3.0227e-09	0.166084	0.163722	0.167915	0.402712	5.1992e-128	1.05814	5.31e-15	2.22233e-18	6.33012e-09	2.96192e-19	7.1839e-38	8.26421e-10	1.90812e-11	6.66139e-16	1.41945e-09	1.51112e-08	5.6441e-17	2.13755e-09	0.00583982	2.83413e-13	0.140186	9.1054e-10	2.10111e-19	6.22523e-09	0.165275	3.27475e-30	0.18555	0.0449983	6.82763e-18	0.0978221	5.01401e-15	2.23269e-20	1.10602e-09	4.88941e-13	8.4341e-21	2.91794e-09
Chi-squared		90.3083	86.9209	110.976	118.668	110.028	132.297	137.445	121.117	163.719	128.849	113.881	152.41	53812	38652.3	3.04193e+06	129.857	116.519	148.654	258.048	1187.05	7533.59	21.6876	21.437	21.4856	22.1012	22.2107	22.2116	85.731	85.6907	85.6961	101.185	111.991	128.969	147.048	137.135	14679.2	79.1662	76.2259	99.668	96.0622	87.0659	108.065	119.888	105.047	159.761
		acceptable	100% acceptable		acceptable	100% acceptable		acceptable	81.6% acceptable		acceptable	100% acceptable		not acceptable	not acceptable		acceptable	98.1% acceptable		not acceptable	not acceptable		acceptable	100% acceptable		acceptable	100% acceptable		acceptable	100% acceptable		acceptable	100% acceptable		not acceptable	14.5% acceptable		acceptable	100% acceptable		acceptable	100% acceptable		acceptable	93.8% acceptable
