# Supplementary material for: A simulation-free constrained regression approach for flux estimation in isotopically nonstationary metabolic flux analysis with applications in microalgae
Source: Front Plant Sci. 2023 Nov 23;14:1140829. doi: 10.3389/fpls.2023.1140829 (PMC10702240; doi:10.3389/fpls.2023.1140829)
Supplement: Supplementary file 10 [file Table_9.xlsx]

## Sheet: S9
Table S9. Spearman correlation coefficients between different version of constrained regression and INCA
			constrained-regression															INCA
	Spearman correlation		pool size fixed, compartmentation sampled			pool size from INCA, compartmentation sampled			pool size as predicted variable, compartmentation from INCA			rescaled MID			v_exch_measured/100			all possible MIDs			7 MIDs used in regression only
			C. reinhardtii	C. sorokiniana	C. ohadii	C. reinhardtii	C. sorokiniana	C. ohadii	C. reinhardtii	C. sorokiniana	C. ohadii	C. reinhardtii	C. sorokiniana	C. ohadii	C. reinhardtii	C. sorokiniana	C. ohadii	C. reinhardtii	C. sorokiniana	C. ohadii	C. reinhardtii	C. sorokiniana	C. ohadii
constrained-regression	pool size fixed, compartmentation sampled	C. reinhardtii	1	1	0.751283	0.80219	0.520136	0.751283	1	0.751283	0.751283	0.928806	1	0.800215	0.897281	0.924477	0.894639	0.965343	0.909325	0.909886	0.965343	0.85148	0.912282
		C. sorokiniana	1	1	0.751283	0.80219	0.520136	0.751283	1	0.751283	0.751283	0.928806	1	0.800215	0.897281	0.924477	0.894639	0.965343	0.909325	0.909886	0.965343	0.85148	0.912282
		C. ohadii	0.751283	0.751283	1	0.729139	0.517701	1	0.751283	1	1	0.566873	0.751283	0.734064	0.578661	0.885296	0.918194	0.684424	0.870786	0.871323	0.684424	0.767358	0.873617
	pool size from INCA, compartmentation sampled	C. reinhardtii	0.80219	0.80219	0.729139	1	0.880321	0.729139	0.80219	0.729139	0.729139	0.774508	0.80219	0.987866	0.773179	0.689016	0.689016	0.857617	0.640777	0.717915	0.857617	0.889898	0.634422
		C. sorokiniana	0.520136	0.520136	0.517701	0.880321	1	0.517701	0.520136	0.517701	0.517701	0.497588	0.520136	0.840011	0.491359	0.404697	0.409552	0.61612	0.320855	0.445539	0.61612	0.720994	0.317107
		C. ohadii	0.751283	0.751283	1	0.729139	0.517701	1	0.751283	1	1	0.566873	0.751283	0.734064	0.578661	0.885296	0.918194	0.684424	0.870786	0.871323	0.684424	0.767358	0.873617
	pool size as predicted variable, compartmentation from INCA	C. reinhardtii	1	1	0.751283	0.80219	0.520136	0.751283	1	0.751283	0.751283	0.928806	1	0.800215	0.897281	0.924477	0.894639	0.965343	0.909325	0.909886	0.965343	0.85148	0.912282
		C. sorokiniana	0.751283	0.751283	1	0.729139	0.517701	1	0.751283	1	1	0.566873	0.751283	0.734064	0.578661	0.885296	0.918194	0.684424	0.870786	0.871323	0.684424	0.767358	0.873617
		C. ohadii	0.751283	0.751283	1	0.729139	0.517701	1	0.751283	1	1	0.566873	0.751283	0.734064	0.578661	0.885296	0.918194	0.684424	0.870786	0.871323	0.684424	0.767358	0.873617
	rescaled MID	C. reinhardtii	0.928806	0.928806	0.566873	0.774508	0.497588	0.566873	0.928806	0.566873	0.566873	1	0.928806	0.78591	0.990294	0.753158	0.712847	0.917005	0.777367	0.74561	0.917005	0.749231	0.772203
		C. sorokiniana	1	1	0.751283	0.80219	0.520136	0.751283	1	0.751283	0.751283	0.928806	1	0.800215	0.897281	0.924477	0.894639	0.965343	0.909325	0.909886	0.965343	0.85148	0.912282
		C. ohadii	0.800215	0.800215	0.734064	0.987866	0.840011	0.734064	0.800215	0.734064	0.734064	0.78591	0.800215	1	0.794028	0.700699	0.700699	0.855722	0.665589	0.742871	0.855722	0.907805	0.655493
	v_exch_measured/100	C. reinhardtii	0.897281	0.897281	0.578661	0.773179	0.491359	0.578661	0.897281	0.578661	0.578661	0.990294	0.897281	0.794028	1	0.728054	0.694118	0.884105	0.768509	0.726614	0.884105	0.728596	0.757519
		C. sorokiniana	0.924477	0.924477	0.885296	0.689016	0.404697	0.885296	0.924477	0.885296	0.885296	0.753158	0.924477	0.700699	0.728054	1	0.992355	0.859542	0.98361	0.984217	0.859542	0.832807	0.986808
		C. ohadii	0.894639	0.894639	0.918194	0.689016	0.409552	0.918194	0.894639	0.918194	0.918194	0.712847	0.894639	0.700699	0.694118	0.992355	1	0.82681	0.976091	0.976693	0.82681	0.82528	0.979264
INCA	all possible MIDs	C. reinhardtii	0.965343	0.965343	0.684424	0.857617	0.61612	0.684424	0.965343	0.684424	0.684424	0.917005	0.965343	0.855722	0.884105	0.859542	0.82681	1	0.836761	0.859023	1	0.874662	0.8264
		C. sorokiniana	0.909325	0.909325	0.870786	0.640777	0.320855	0.870786	0.909325	0.870786	0.870786	0.777367	0.909325	0.665589	0.768509	0.98361	0.976091	0.836761	1	0.96161	0.836761	0.772885	0.996759
		C. ohadii	0.909886	0.909886	0.871323	0.717915	0.445539	0.871323	0.909886	0.871323	0.871323	0.74561	0.909886	0.742871	0.726614	0.984217	0.976693	0.859023	0.96161	1	0.859023	0.893279	0.960792
	7 MIDs used in regression only	C. reinhardtii	0.965343	0.965343	0.684424	0.857617	0.61612	0.684424	0.965343	0.684424	0.684424	0.917005	0.965343	0.855722	0.884105	0.859542	0.82681	1	0.836761	0.859023	1	0.874662	0.8264
		C. sorokiniana	0.85148	0.85148	0.767358	0.889898	0.720994	0.767358	0.85148	0.767358	0.767358	0.749231	0.85148	0.907805	0.728596	0.832807	0.82528	0.874662	0.772885	0.893279	0.874662	1	0.770756
		C. ohadii	0.912282	0.912282	0.873617	0.634422	0.317107	0.873617	0.912282	0.873617	0.873617	0.772203	0.912282	0.655493	0.757519	0.986808	0.979264	0.8264	0.996759	0.960792	0.8264	0.770756	1
